# Supplementary material for: Overcoming the numerical challenges owing to rapid ductile localization
Source: Copernicus journal article supplement (doi:10.5194/egusphere-2025-2417), 2025-08-12
Supplement: Supplementary file [file egusphere-2025-2417-AC4-supplement.pdf]

The study by A. Spang and co-authors investigate the numerical issues for the problem of ductile strain localisation and propose several techniques how to mitigate them. The investigation is clear and systematic, however, the main weakness is that all the proposed methods (maybe less the gradient regularisation) to overcome the problems are numerical in nature, and are less grounded in the physics of the problem. For example, in the majority of the tests, the temperature during thermal runaway reaches 5000 K or more (which is ~surface temperature of the Sun and a lot higher than any current estimates for the core-mantle boundary temperature) - and I'm surprised nowhere in the manuscript this is discussed that it's not physical. When temperatures reach the solidus (between 1000-2500 K for most rocks in the upper mantle), rocks starts melting. During melting, energy in the form of latent heat is consumed, and temperatures stay constant. Have the authors considered a stabilisation mechanism based on temperature (i.e., limit  $T_{max}$ ) and the thermodynamics of melting during strain localisation? This could be a starting point on how to regularise/limit the runaway from a physics angle.

**Reply:** We agree that the 1D models reach unrealistic values (temperature with viscosity regularization, velocity with gradient regularization). The reason for this is that 1D models assume an infinite shear band. These models are inherently unrealistic and produce unphysical results in the end-stage of a self-feeding process like thermal runaway. The same result is observed in similar studies like Kameyama et al., 1999, Figure 3 (model is stopped at reaching 1200 K after only 1% of stress drop) or Braeck et al., 2007, Figure 4 (non-dimensionalized temperature and clipped colormap). We did not comment on the values as they are not the focus of the study (numerical stability is) and common for these kinds of models. But we agree that a statement is helpful and added a new paragraph with this explanation (new section 6.5).

We have added a form of melting as a third regularization technique to our code. We use the anhydrous parameterization of Katz et al., 2003 to compute melt fraction and take latent heat into account in the energy conservation equation (new section 3.4.3). Melting should introduce additional weakening in the rheology and increase the intensity of thermal runaway, but we neglect this for simplicity. It is essentially a best-case scenario for melting as a regularization.

The results are shown in the new Figure 6 and section 4.3.3. The shear zone (1D) or rupture tip (2D) melts completely within milliseconds and then temperature continues to grow. Melting cannot regularize thermal runaway. We also added a paragraph to section 4.3.4 to discuss what mechanisms would be necessary on top of melting to make it more effective energy sink.

Limiting the maximum temperature without invoking a physical mechanism would mean artificially creating an energy sink and violating energy conservation. We think

that this is not more physical than our methods and that it provides less control than viscosity regularization.

Therefore, I suggest that the authors discuss their regularisation methods more in terms of physics. Of course numerical stability and solver convergence are important, but the choices for regularisation need to be justified more. This would highly improve their study, and make the proposals more useful to the scientific community. The manuscript is mostly well-written and well-structured, although it requires some revision of the text to avoid vague statements. I detail these points below. Considering that the revision work I propose is considerable, I recommend a major revision of the manuscript, but could be a valuable contribution to GMD.

**Reply:** We agree that the different regularization methods should be put in more context with respect to potential underlying physical mechanisms. We added a new section (4.3.5) to discuss physical interpretations of the regularization approaches we present.

However, our study focuses on the numerical aspects of employing different regularization approaches and we see this study in line with other studies (Jacquey and Cacace 2020, Duretz et al., 2023, Goudarzi et al., 2023, all cited in the manuscript) that also focus on the numerical aspects. We also want to stress here that we do not claim that the proposed numerical approaches represent the only solution to this problem.

1. What is the physical explanation for the proposed methods? I think they need to be better justified.

\* This starts with the title. The authors changed the title after submission to include the code name. I suggest they revert to something close to the original title "Overcoming numerical challenges during rapid ductile localisation", because the information in this manuscript should transcend the numerical implementation hopefully (despite faster future languages and algorithms the lessons here will still hold for the problem of ductile strain localisation). The authors use DEDLoc as a tool to demonstrate the proposed techniques.

**Reply:** We agree with the reviewer here. It is exactly the reason why we did not include DEDLoc in our original manuscript title. However, it is journal policy that the code name needs to be included in the title, therefore we had to add the code name. We would be happy to revert to the original title if given the possibility.

\* The viscosity regularisation (Section 3.5.1) is essentially a minimum viscosity cut-off technique. However, it can be thought as another flow law defining an isotropic

viscosity, which is active together with ductile flow laws. My point is that the authors should not introduce "extra-bits" in the physical model that are not justifiable.

**Reply:** The viscosity regularisation is indeed a minimum viscosity cut-off. The analogy to another flow law active alongside diffusion creep, dislocation creep, and LTP is however not quite accurate. As the regularisation viscosity is in parallel with the other flow laws (Figure A1), it is only active if one of them becomes as weak as the regularization. At this point, the flow laws might not be accurate anymore anyways.

Regarding adding “extra-bits” to the physical model, there might be a misunderstanding. We are not claiming anywhere that these are physical. We are not trying to mimic a physical process with viscosity or gradient regularization. We are trying to achieve a reproducible numerical result that is physically accurate until the regularization starts to play a role. And beyond that point, it is clear which numerical parameters govern the model behavior and in what way. As such, these “extra-bits” are justifiable and necessary in our opinion.

\* While the gradient regularisation (Section 3.5.2) seems more physical, the significance of  $\lambda_{\text{reg}}$  is not explained. For example, what to expect with shear heating and localisation when  $\lambda_{\text{reg}}$  is small/large?

**Reply:** We added a sentence to this section to explain that a larger  $\lambda_{\text{reg}}$  results in more smoothing and damped runaway.

\* All the methods controlling time-step size and the implementation (within/outside solver iterations) need to be explained how they impact the physics (i.e. stress states, especially since  $\Delta t$  impacts elastic stresses). For example, even the Courant–Friedrichs–Lewy (CFL) criterion of limiting the time-step size during advection has a physical meaning, because it says that information from a given cell or mesh element must propagate only to its immediate neighbours.

**Reply:** Our time step controls outside the iterations (4.1.1 and 4.1.3) impact the physics like any other time stepping control, including the CFL criterion. The exception is the iteration-adaptive method (4.1.2) which is unstable. Likely because it interferes with the strain rate partitioning and stress state. We point this out in line 222 of the original manuscript.

\* Adaptive rescaling (Section 4.2). The proposed scaling of variables seems ad-hoc - based on trial and error (L257). By non-dimensionalising the system of equations (rather than individual variables), one can derive non-dimensional numbers that control the

physics of the problem - i.e. elastic loading, creep and thermal run-away. Have the authors tried to take this approach instead to inform on the time step size? Alternatively, what are appropriate values of characteristic scales to capture correctly these processes? (L242) What is the impact of non-dimensionalisation? (L251).

**Reply:** There might be a misunderstanding about what we are describing in this section based around the terms nondimensionalization and characteristic scales. We will try to clarify this.

1) We are not looking to non-dimensionalize the equations to identify nondimensional numbers that describe the process of thermal runaway. This has been done in previous studies (Ogawa 1987, Braeck et al, 2009, Spang et al., 2024, all cited in the manuscript).

2) The sole purpose of internal scaling is to prevent round-off errors by centering quantities around 1 by dividing them by values which are typical for these quantities. This is stated in the first line of the section. It also has the side effect of making the quantities dimensionless.

3) This has no effect on the physical time step or any other physical quantity.

4) The adaptive rescaling is not an ad-hoc solution based on trial and error. In line 248 (now 283), we point out that the idea behind it is to prevent round-off errors due to numerical precision. Line 257 simply points out where this method starts to become effective. We went with  $10^{-9}$  based on the numerical precision of  $10^{-15}$ , but the analysis shown in Figure 4 reveals that  $10^{-12}$  is actually sufficient in our case.

To avoid the mix up with nondimensionalization of equations, we removed the term “characteristic” from the paragraph and renamed  $t_c$  to  $t_{sc}$  for scaling (same for other “characteristic scales”). We kept the subscript ND as the scaled quantities in the code are nondimensional on top of being scaled.

\* Melting during thermal runaway is not even discussed or considered as a potential way to limit runaway. Figures 5 and 6 show that  $T_{max} > 5e3$  deg C, in some cases reaching  $1e5$  deg C (L316). This is unrealistic, yet it is not even mentioned. The authors should at least discuss what would happen with the shear zone when temperatures go above the solidus and you have melting. It's possible that thermal diffusion (L37) and melting may limit the feedback loop.

**Reply:** Please see our reply on page 1 regarding the temperature and melting. Thermal diffusion is already in the model and cannot limit the runaway. The central concept of thermal runaway is that heat production by viscous dissipation is far greater than heat loss by thermal diffusion.

\* Finally, how much of these problems are impacted by numerical errors due to the APT method (tolerance, iterations)? How about solving the system of equations with other methods such as Newton and Picard?

**Reply:** The APT method has numerical errors like every other method. Duretz et al., 2019 compare the APT method with a Newton solver and find no differences for the same problem of ductile strain localization due to shear heating. This paper is already cited in our section on the APT method. Testing different solver methods goes far beyond the scope of this study.

2. The writing requires revision and some re-structuring, mostly to avoid vague sentences and provide clarity.

\* The manuscript contains challenge/challenging 18 times, which they seem to mean a number of things but never clear enough. Please reduce the usage and be more specific. Some examples (more in minor points),

**Reply:** Considering the title and topic of the manuscript, we don't think 18 is excessive. We also disagree that they mean a number of things. We always use this term to describe a situation that does not have an easy or obvious solution. You could replace every instance of "challenge" with "problem" and "challenging" with "difficult" and not change the meaning of the text. Except for line 332, we think all uses of these terms are appropriate. In most cases, these terms are used in the first sentence of a paragraph, and the following sentences give clarifications.

Section 4: "Challenges" could be renamed "Test cases"

**Reply:** We don't think that "Test cases" is a good description of the contents of Section 4. Section 4 shows the aspects of the model that are challenging (difficult, problematic) and how we solve them. We changed the title to "Numerical challenges and solution strategies".

L328-229: It would be helpful to tell the readers why it is challenging.

**Reply:** We specified that solution time for diffusive processes scales quadratically with the number of cells.

L332: what challenges?

**Reply:** We replaced "challenges" by "numerical errors". This is an introductory sentence; the problems are explained in the following paragraphs.

\* Structure and the logic of arguments in the introduction could be revised. First, strain localisation should be defined, either in the abstract (L1) or introduction (L15). Also clarify and explain the different types of localisations, brittle and ductile - and why is it difficult to solve them numerically. A parallel between brittle and ductile localisation would be helpful.

**Reply:** We agree with the reviewer that the introduction was missing a definition of strain localization. We have added a sentence to the beginning of the introduction to do that. We have also added another sentence to name a few geological processes which are governed by strain localization. The sentence in line 25 of the original manuscript has been extended by a short explanation of what brittle failure is. The start of the next paragraph (line 31 in the original manuscript) has been extended by an explanation of how ductile localization occurs and how it differs from brittle localization. We think lines 17-22 in the original manuscript already explain why localization is difficult to model.

\* The discussion could take the reader back to the introduction/motivation. Potentially propose other ways to regularise the model, in relation to the scientific problem (i.e., melting, grain size evolution or phase transitions for deep earthquakes; Billen et al. 2020). Also, what is the optimal recipe of the proposed methods in the end?

**Reply:** We added new subsections 6.2 and 6.3 to discuss grain size evolution and phase transformation. Melting is now part of the tested approaches. Regarding the recipe, in 1D, all methods (one out of viscosity and gradient regularization) are necessary. 2D is not as demanding due to the coarser resolution, this is now discussed in section 5.1 (Lines 380-393 in the original manuscript).

\* Methods section should have distinct parts for theory and numerical implementation. At the moment, they are mixed and it is confusing.

1. Theory: governing equations, constitutive equations such as Rheology (3.2) Density (3.3) - should be together.
2. Numerical implementation: APT method - including formulation for governing and constitutive equations, model setup (1D and 2D), boundary conditions, spatial discretisation.

**Reply:** Following the advice of reviewer 1, we restructured sections 2 and 3 in the following way: 2.1 Governing equations (including density now), 2.2 Rheology, 2.3 Model setup, 2.4 The 1D case. 3.1 Spatial discretization, 3.2 APT method, 3.3 Viscosity update, 3.4 Regularization.

L159: revise phrasing. For both the 1D and 2D models, we employ a variable grid, with the smallest cell size in the center of the model.

**Reply:** We rephrased the sentence as suggested.

\* Section 4.3.3: Figures 5 and 6 should be combined (2 columns for each method, and 4 rows). Also, both figures should be discrete marker plots, not line plots - because experiments have not been done for a continuum of  $\eta_{\text{reg}}$  and  $\lambda_{\text{reg}}$ . The comparison between results should be clear this way.

**Reply:** We combined Figures 5 and 6 into one. We had to shrink the size of the individual panels to not push the caption off the page. We added dots to the lines to clarify which values we actually tested. Without lines, the Figures become difficult to read due to the many overlaps.

Minor points

L4: comes at a large computational cost

**Reply:** Fixed.

L5: result in rapid strain localisation (without "ductile")

**Reply:** We prefer to keep "ductile" here to emphasize that not all strain localization is brittle. We instead removed the "ductile" in front of "processes" in the same line to avoid repeating the word inside that sentence.

L6: delete "further"

**Reply:** Done.

L8: state which regularisation method are used

**Reply:** Done.

L13: rephrase "may differently impact..." being more precise.

**Reply:** We added another sentence after this one, explicitly stating which physical quantities are most affected by the two regularization approaches.

L15: rephrase: of solid deformation, common to solid deformable materials. Next sentence: how does strain localisation occur in solid Earth processes?

**Reply:** We included “solid” in the first (now second) sentence of the manuscript. We also added a follow-up sentence to mention where strain localization governs deformation.

L19: lacks a characteristic scale in time and space.

**Reply:** We would like to keep our phrasing.

L22: define plate-scale and grain-scale model.

**Reply:** We added the order of magnitude of the sizes of such models to the text.

L25: delete "However"

**Reply:** Done.

L28-30: disagree with this statement or at least how it is phrased: "strain localisation can occur at depths where ductile deformation would be expected".

**Reply:** We feel that this paragraph provides enough reasons for this statement as it is.

L34: Reference to Fig 2 - since both panels are referenced, remove "a,b".

**Reply:** Fixed.

L40: Summarise briefly the model in Spang et al (2024), i.e., using a 1D viscoelastic model ...

**Reply:** We are unsure what exactly the reviewer is asking here as the paragraph in question is already a brief summary of the model, its purpose, and behavior. We now added the word visco-elastic to the first sentence.

L47: the challenges to brittle failure have not been introduced before to say "similarly to brittle failure". Spiegelman et al (2016) is a good reference for brittle localisation.

**Reply:** We shifted this statement to be after the list of challenges and added the citation along with another appropriate one.

L50: what do the authors refer to as unstable solutions? non-reproducible?



**Reply:** We were referring to cases where the solver does not converge at all or might even diverge. As this can also be summarized under poor solver convergence, we removed this point.

L53: reference for APT method?

**Reply:** Fixed.

L54-55: enumeration error: employing an adaptive time-stepping and monitoring viscosity convergence are not on the same level of action/strategy - one is active implementation, one is passive diagnostic.

**Reply:** As viscosity convergence is not only a monitored property but defines (among others) whether convergence is reached or not, we think that both are on a similar level. We adjusted the wording to “enforcing viscosity convergence”.

L60, 64: the coefficients flow factors have not been introduced. This section should come after the theory.

**Reply:** This section was moved after the rheology section.

No need for section titles 2.2.1, 2.2.2. The reader will know from the text that you refer to 2D and a simplified 1D case.

**Reply:** Following the suggestions of Reviewer 1, these two sections were split apart and are now 2.1 and 2.4 respectively.

L69-70: this sentence is redundant.

**Reply:** We removed it.

L78: inertial and body forces from Eq. 1, thermal expansion and radiogenic heating from Eq. 3

**Reply:** Fixed.

Eq. 5: Are rotation and advection of stresses included in the elasticity term?

**Reply:** No, stresses are not advected or rotated. We added that we use the small strain approximation in the first sentence of section 3.

L86: Kronecker delta.

**Reply:** Fixed

L88: governing eps are only 1-3; Eq 1-6 are simplified such that...

**Reply:** Fixed.

L90-100: can be written in a compact form to follow Eqs. 1-6. At the moment, Eq 2, 4, 6, 1.

**Reply:** We agree, but we prefer the slightly longer version as we feel that it is easier to follow why all these simplifications can be made.

L136: it would be helpful to explain where each mechanism is expected to be dominant.

**Reply:** We added a sentence for that at the end of the Rheology section.

L146: cannot

**Reply:** Fixed.

L146: weird logic. The opposites are 1) analytical vs numerical; 2) direct vs iterative approach. Rephrase: cannot be solved analytically, such that it requires a numerical approach.

**Reply:** Fixed.

L146-153: should be in the APT section.

**Reply:** This part is now section 3.3 (Viscosity update) and follows the APT section.

Eq 27: why is density not a function of temperature as well? This could also help constrain the runaway. The choice of this constitutive equation should be better justified.

**Reply:** We tested thermal expansion in a previous 2D study (Spang et. al, 2025, cited in the manuscript) and found it to not play a significant role. We introduced a new section (6.1) to discuss the reasoning and/or effects of our simplifications. This section is also referenced after the governing equations.

L165: What is the minimum grid size for 2D?

**Reply:** 26 meters. We added the number of cells per direction and their respective size.

L166: use a staggered grid approach, where ....

**Reply:** Fixed.

L172: alternative regularisations for brittle failure

**Reply:** Fixed.

L191: Rephrase without "for conciseness": We use primarily 1D models to illustrate the challenges ... Similar problems arise in 2D models, which are discussed in Sect 5.

**Reply:** We now use the phrasing suggested by the reviewer.

L195: Evolution of model or description of problem is missing in Sec 4.1

**Reply:** The evolution of the model is described in the introduction and Figure 1b. We added a sentence to remind the reader of this. The problem is that we want large time steps for the loading and LTP stage and tiny time steps during runaway. This is what the first two sentences in the paragraph state.

L197: What is the duration of the runaway stage? How many time-steps are required?

**Reply:** As runaway is an exponential process, we find it difficult to define exactly where it starts and ends. If we define the start as the moment stress drops below 1800 MPa and the end as the moment where stress is 0, then the duration is about 250 years. If we define 1500 MPa as the start where the stress evolution appears to be vertical in Figure 3a, it is 5 years. If we define the runaway stage as the period with a stress change of more than 1 MPa/s (10% of the maximum stress gradient, covers the range between 1300 and 125 MPa), then it takes about 300 seconds. In any case, we are talking about 1500 to 1700 time steps for the example in Figure 3.

L201: vague statement. There are various of numerical methods proposed in the literature...

**Reply:** We are not sure if this comment is a suggestion for rephrasing or a rough quotation of the vague statement. The sentence in question acknowledges that our study is not the first to identify time stepping as an important problem and propose a solution. An exhaustive summary of available methods is beyond the scope of this section. We changed the sentence to "... and a number of studies propose different

methods” and added more references.

L205: what does it mean physically to exceed these values?

**Reply:** Exceeding these values means that the state of the system changes significantly within a single time step. This can have two consequences. 1) The solver does not converge. 2) Nonlinearities are underestimated and short-term processes are missed. Figure 3 shows exactly this. If the time step is too large, the feedback loop between shear heating and deformation is underestimated, and we see an incomplete runaway with much lower velocity and temperature.

Eq 31: what values are allowed for the  $\min()$  term, when  $dT_{n-1} < dT_{\max}$ ? Should it be  $\min(\min(), 1)$ ? i.e., keep  $dt$  constant otherwise.

**Reply:** We allow an increase of up to 25%. So it would be  $\min(\dots, 1.25)$ . We pointed this out in line 235. But we agree that it is better to already state it here. We updated the equation.

L219: are model results for this case plotted in Fig. 3?

**Reply:** The method is unstable, so we did not plot it. We added a sentence to clarify this.

L223: plot solver behaviour? If solutions are unreliable, this is not a good method.

**Reply:** It is indeed not a good method. We added a sentence to clarify that. But we still felt that it was worth mentioning that we tested it in case a reader might consider using it.

L223: define PT iterations, or use APT

**Reply:** PT is defined in line 149 of the original manuscript.

L245, Eq (32): this means a non-dimensional time step (remove "would internally be") and the equation doesn't need to be separate line.

**Reply:** Fixed.

L254: two orders magnitude

**Reply:** Fixed.

L261: quantify dramatically. i.e. up to 10 orders magnitude.

**Reply:** We added that it decreases more than 10 orders of magnitude. How much exactly, depends on the regularization.

L262: generally challenging...? What does it mean?

**Reply:** Challenging means difficult. We removed “generally”.

L264: instead of the physics of the problem.

**Reply:** We adopted this phrasing.

L267: 60 1-D simulations? More explicit about what numerical resolutions and values of  $\eta_{\text{reg}}$  are used.

**Reply:** We added the values for all three parameters.

L275: statement not clear: As  $\eta_{\text{reg}}$  is further reduced, this divergence propagates to higher-resolution models, following the same pattern.

**Reply:** We rephrased this sentence for clarification.

L288-289: repeated sentence as in previous section. It's better to state at the beginning: the following diagnostics are used...

**Reply:** We moved the list of diagnostic parameters to the top paragraph of the regularization section to avoid repeating it. The sentence structure is still repeated in sections 4.3.1 and 4.3.2 but we do not think that this hurts the flow of the text. Instead, it illustrates that both methods have the same first-order effect.

L297-298: What was the stopping criterion for these simulations? Why sims with high  $\lambda_{\text{reg}}$  didn't finish?

**Reply:** The stopping criterion was the allocated run time of one day. We continued these simulations from a restart database, but most of them did not finish after a second day either, due to extremely small timesteps. We considered continuing them a waste of computational resources as in our opinion the trend can be observed in Figure 6d as it is.

The reason for the slow convergence is that the gradient regularization diffuses heat (or shear heating to be more precise) and the iteration count for diffusive processes scales quadratically with resolution. At the same time, increasing the diffusion coefficient

(lambda\_reg) reduces the physical time step, thus more time steps are required for the same time period. This is pointed out in section 4.3.3 (now 4.3.4).

L308: known correspondence between eta\_reg and lambda\_reg.

**Reply:** Fixed.

L340: This statement on LTP should come earlier where rheology is introduced.

**Reply:** We copied this statement to the rheology section and shortened it here.

L395: reproducibility is also a problem.

**Reply:** Yes, reproducibility is a problem. Regularization is a powerful tool to make numerical results more reproducible. We now mention reproducibility in the introduction and throughout the manuscript.

## Figures and Tables

Figure 1: explain briefly why LTP is dominant in the stage prior to runaway but dislocation creep is dominant in the stage post runaway.

**Reply:** We instead added an explanation to the text section that references Figure 1b. (Line 57 in the new manuscript).

Figure 2: What are the height and length of models?

**Reply:** We added the extents of the models to the caption. They are also given in the model setup section.

Table 1: There should be another column explaining the physical meaning of each parameter.

**Reply:** We added such a column.

Figure 3: Revise caption: Model results with fixed and adaptive time-stepping. Panel b (or new panel): Plot T increase and viscosity decrease. Panel a: there is a large stress difference post runaway between methods. What causes that?

**Reply:** We adapted the Figure title and added panels for the evolution of temperature, viscosity, and slip velocity. The evolution of timestep was turned into an inset. The larger

time steps result in less violent runaway (i.e., less localization, less temperature increase). Therefore, the viscosity remains larger and stress is not fully released. As those cases don't get as hot, the shear zone can cool down enough to rebuild stress.

Figure 4: Caption: Model results using adaptive rescaling. Sum of iterations or number of iterations? Comma, not full-stop before eta\_reg.

**Reply:** We think that “Effect of adaptive rescaling” is a better description of what the Figure shows. The Figure shows the sum of iterations. We kept the full stop in front of eta\_reg as it is not a model result like the others listed.

Figure 5: a-b) Legend should be the same. The corresponding link between number of cells and min grid size should be explained in the main text (e.g., L267). These plots should not have continuous lines, they are discrete data points for various eta\_reg (same for figure 6).

**Reply:** We think the two legends are very helpful. We now mention the correspondence in the caption. It is already mentioned in the text in line 273 of the original manuscript. We added dots to the lines to clarify which values we tested. Without lines, the Figures become difficult to read due to the many overlaps. As requested above, we combined Figures 5 and 6 into one.

Figure 7: The tolerance was not defined or introduced, i.e. solver tolerance? Panel b is confusing, and not clear what this figure tries to show.

**Reply:** We fixed this oversight. We now introduce the viscosity tolerance in the text before the Figure. Panel b shows how the viscosity  $\eta^{it}$  evolves during the PT iterations towards a target viscosity  $\eta^t$  according to the viscosity relaxation method (Eq. 27, 26 in the original manuscript). It illustrates that this takes hundreds or thousands of PT iterations, depending on the relaxation parameter eta\_rel. This should help explain why the stress overshoots in (a) can occur when the convergence between  $\eta^{it}$  and  $\eta^t$  is not part of the convergence criterion. We made some adjustments in the text and replaced “start” and “target” by  $\eta^{it}$  and  $\eta^t$  which should clarify this.

Figure 8: caption should have the reference parameters stated and the regularisation methods employed.

**Reply:** We added this information to the caption.

Figure 9: reference parameters need to be stated for both 1d and 2D runs.

**Reply:** We added this information to the caption.

Code - Readme.md

1. Provide installation instructions and dependencies. Example errors encountered:

ERROR: LoadError: ArgumentError: Package ParallelStencil not found in current path.

ERROR: LoadError: ArgumentError: Package Plots not found in current path.

**Reply:** We now explain two different ways to install the required packages.

2. Explain function inputs: `ElaDisDifLTP_1D(5e-13, 80.0, 1.8, 10.0, 3.0, 600.0, 2.0, 0.02, 1e15, 127, "Ref")`

**Reply:** Done.
